# Supplementary material for: Gender specific differences in the liver proteome of rats exposed to short term and low-concentration hexabromocyclododecane (HBCD)
Source: PubMed Central journal article supplement (PMC6062380; doi:10.1039/c6tx00166a), 2016-06-30
Supplement: TX-005-C6TX00166A-s002.pdf [file TX-005-C6TX00166A-s002.pdf]

**Suppl. Figure 1:** Image of a rat liver 2D-DIGE gel (master gel, grey level image). All spots with statistically significant abundance changes in any of the different comparisons (HBCD exposure, thyroid state, gender) are labelled ; spot numbers refer to identifications in **Suppl. Table 1**. For data on protein abundance, see **Suppl. Table 2**.

3<

pI (pH)

>10

150

Mr  
(kDa)

8

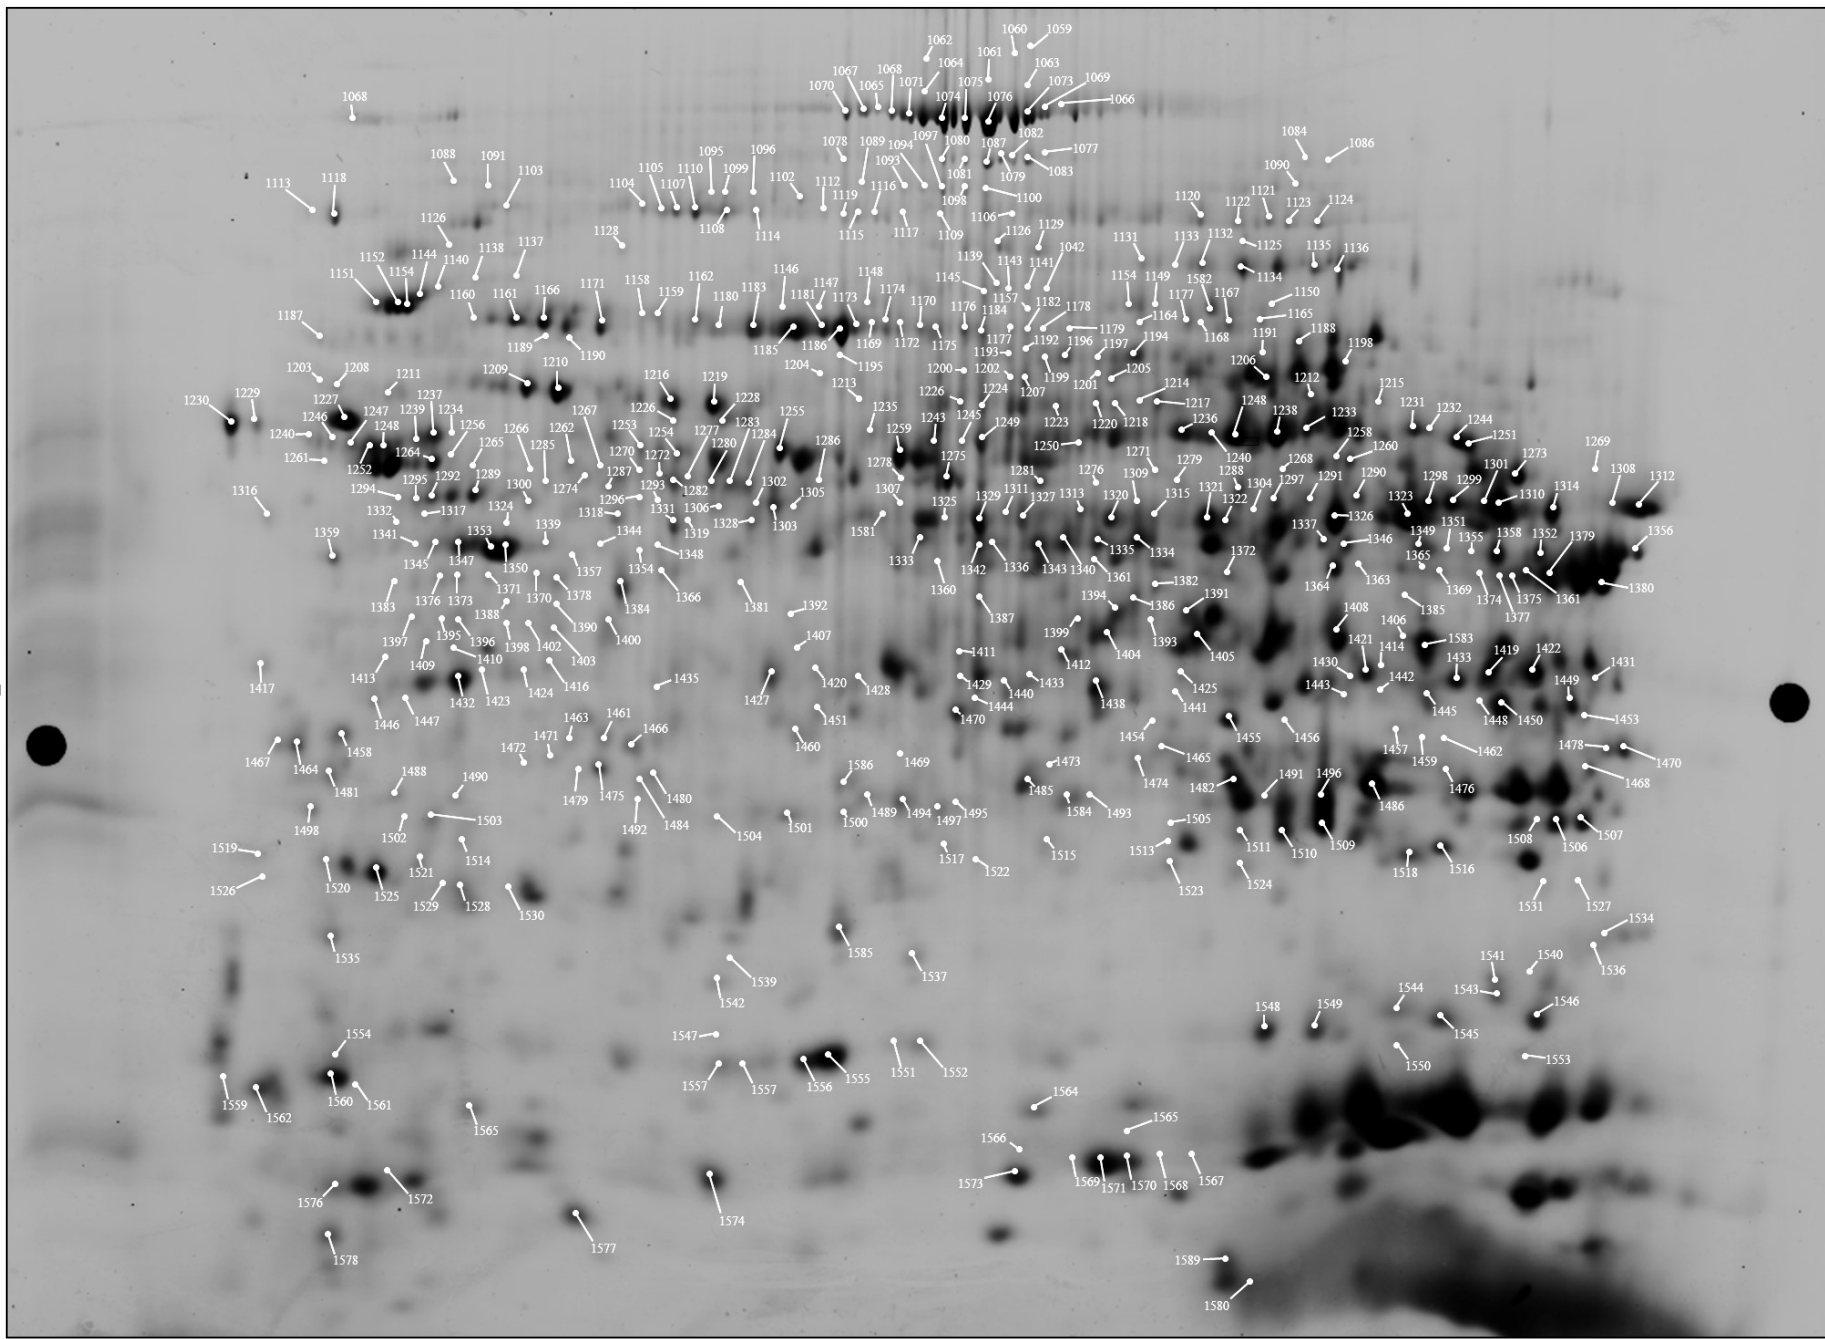

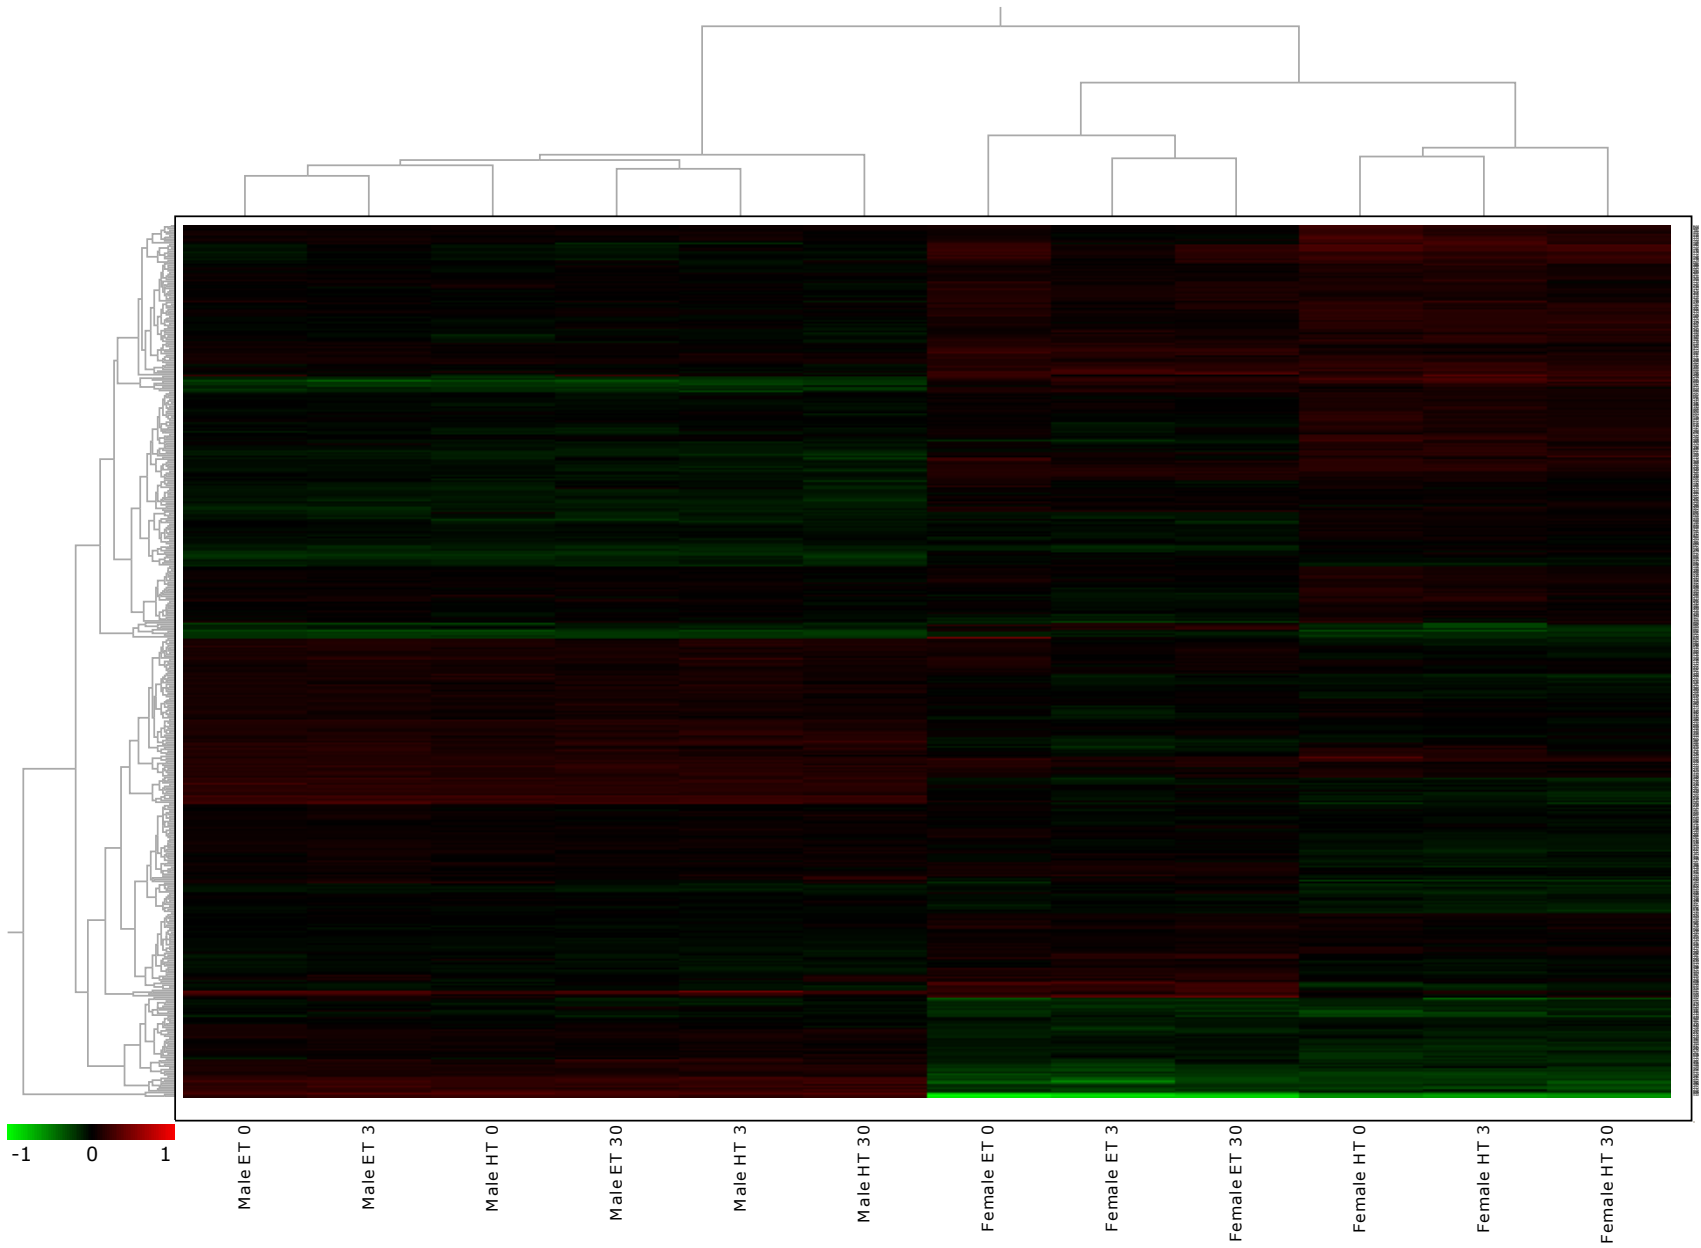

**Suppl. Figure 2:** Heat map and hierarchical clustering of all 496 differentially regulated spots.
